# Supplementary material for: High-resolution analysis of condition-specific regulatory modules in Saccharomyces cerevisiae
Source: Springer Nature journal article supplement (doi:10.1186/gb-2008-9-1-r2), 2008-01-01
Supplement: Additional file 1 [file gb-2008-9-1-r2-s1.pdf]

(a)

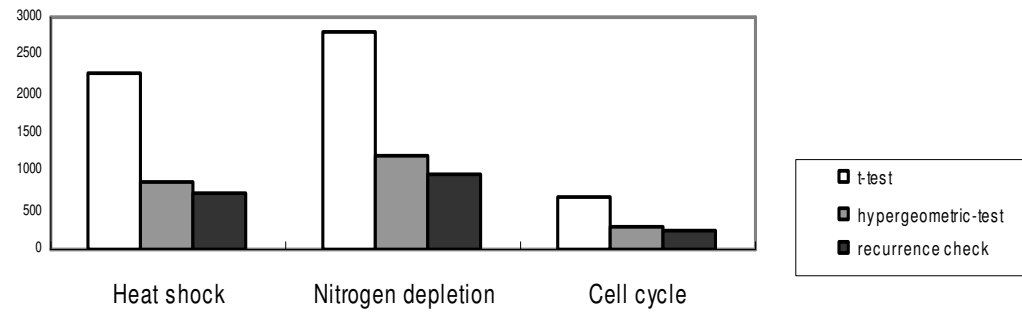

(b)

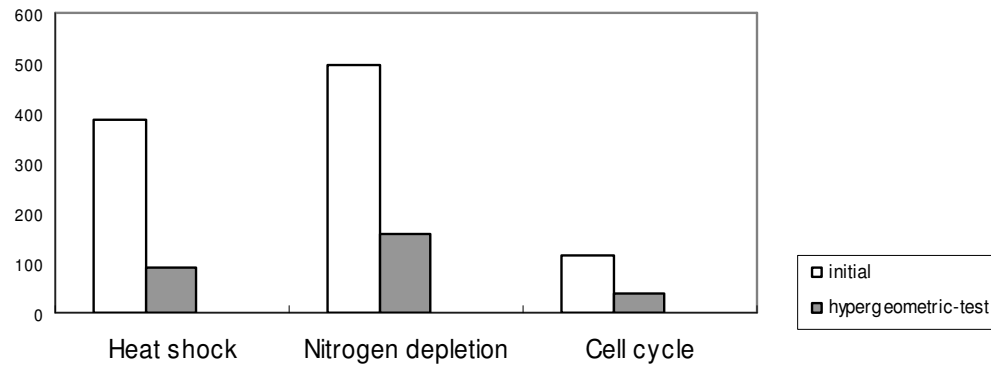

### Additional data 1. Filtering candidate regulators

Bars shown in (a) and (b) represent numbers of motif evidence and ChIP-chip evidence, respectively, which survived from association test with expression patterns and recurrence test under each condition.
