# Supplementary figures and images for: High-resolution analysis of condition-specific regulatory modules in Saccharomyces cerevisiae
Source: Springer Nature journal article supplement (doi:10.1186/gb-2008-9-1-r2), 2008-01-01

## Additional data 9. Regulatory networks among TFs

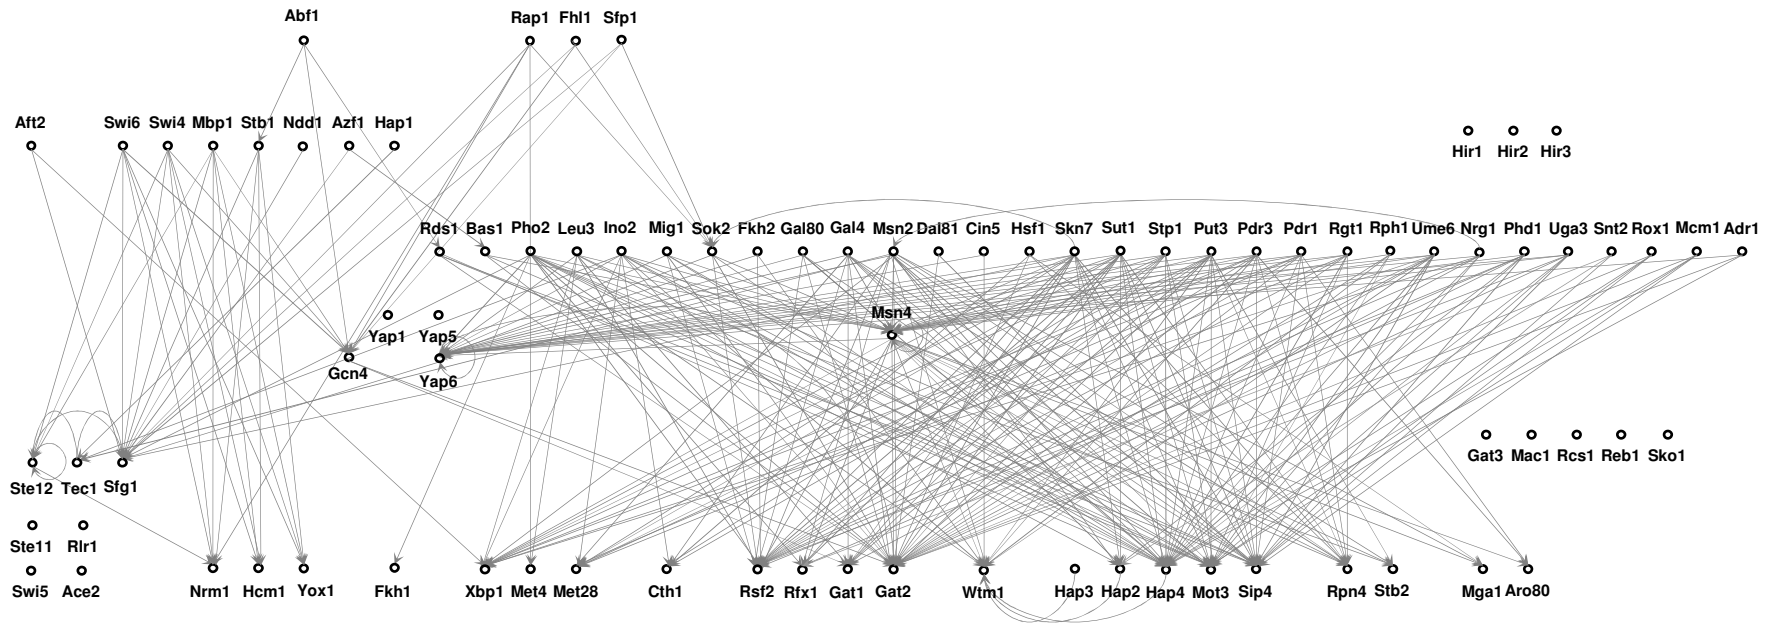

< Heat shock >

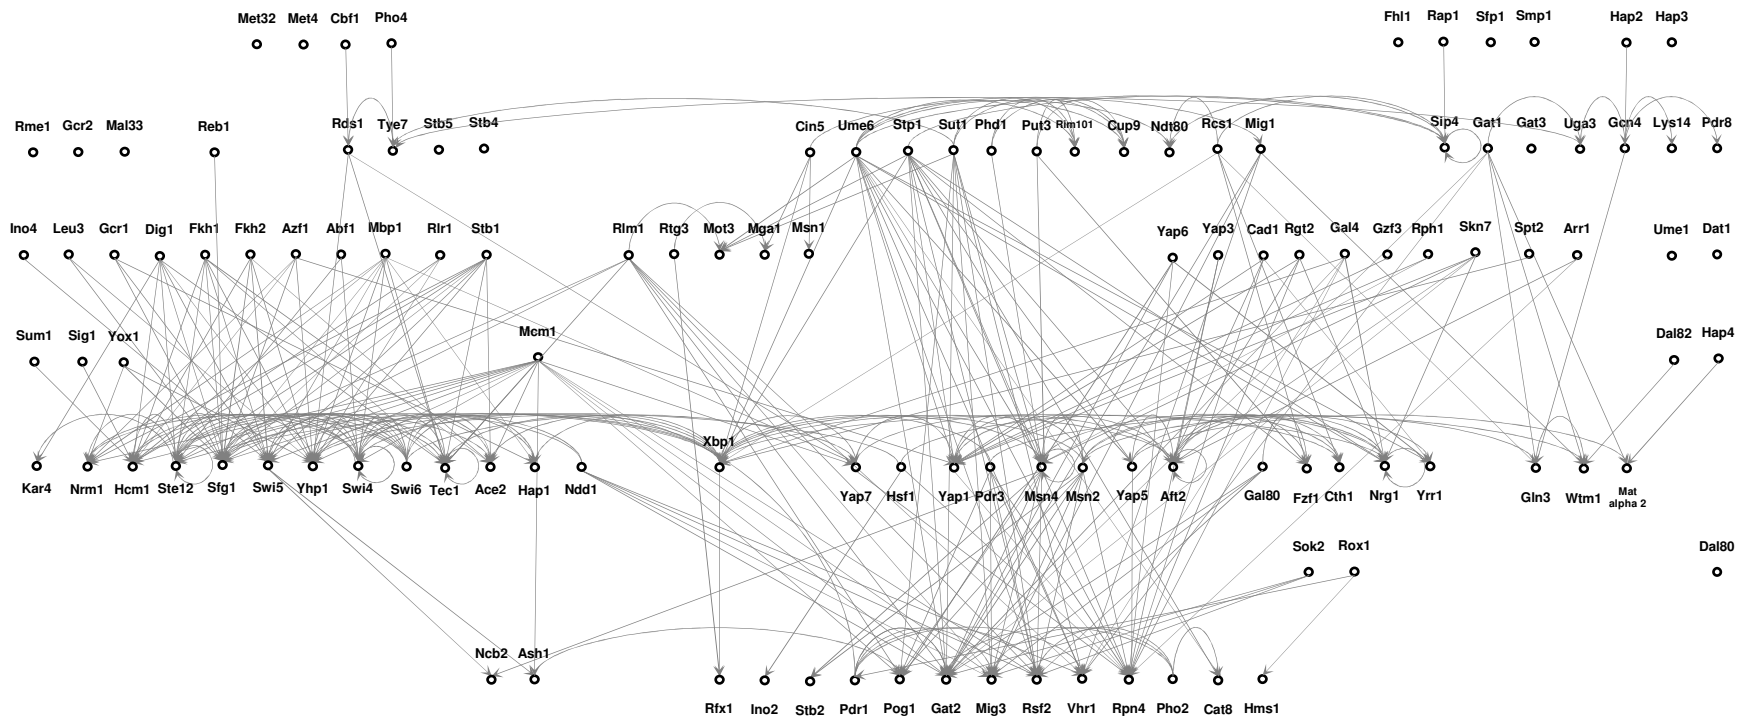

< Nitrogen Depletion >

Supplement: Additional file 9 [file gb-2008-9-1-r2-s9.pdf]
